# Supplementary material
Source: PubMed Central journal article supplement (PMC5015683)
Supplement: NIHMS767760-supplement-01.pdf [file NIHMS767760-supplement-01.pdf]

| <b>Stem Cell Source</b> | <b>Prednisone @ 1 year</b> | <b>Other IST @ 1 year</b> | <b>pTFH %@ 1 year</b> |
|-------------------------|----------------------------|---------------------------|-----------------------|
| PBSC                    | 0 mg                       | sirolimus                 | 6.22                  |
| PBSC                    | 30 mg QD                   | none                      | 7.71                  |
| PBSC                    | 0 mg                       | none                      | 4.98                  |
| PBSC                    | 5 mg QD                    | none                      | 7.97                  |
| PBSC                    | 10 mg QD                   | CSA                       | 6.12                  |
| PBSC                    | 0 mg                       | CSA                       | 5.33                  |
| PBSC                    | 20 mg QD                   | CSA                       | 6.77                  |
| PBSC                    | 20 mg QD                   | CSA                       | 9.72                  |
| UCB                     | 0 mg                       | sirolimus + MMF           | 1.16                  |
| UCB                     | 30 mg QD                   | sirolimus                 | 1.53                  |
| UCB                     | 0.5 mg QOD                 | sirolimus                 | 1.6                   |
| UCB                     | 20 mg QD                   | sirolimus                 | 0.03                  |
| UCB                     | 15 mg QD                   | none                      | 0.21                  |
| UCB                     | 10 mg QD                   | none                      | 1.25                  |
| UCB                     | 0 mg                       | CSA                       | 1.05                  |
| UCB                     | 20 mg QOD                  | sirolimus                 | 0.29                  |
| UCB                     | 2 mg QOD                   | sirolimus                 | 0.15                  |
| UCB                     | 30 mg QOD                  | none                      | 0.66                  |
| UCB                     | 30 mg QD                   | sirolimus                 | 0.57                  |

**Supplemental 1: Immunosuppressive cGVHD medication in patients and TFH percentages at 1 year post transplantation based on stem cell source.**
